# Supplementary material for: The co-occurrence of mtDNA mutations on different oxidative phosphorylation subunits, not detected by haplogroup analysis, affects human longevity and is population specific
Source: PubMed Central journal article supplement (PMC4326891; doi:10.1111/acel.12186), 2013-12-17
Supplement: acel0013-0401-sd2.pdf [file acel0013-0401-sd2.pdf]

**Table 1S a.** Haplogroup distribution in males. SE= Standard Error. Sub-haplogroups with frequencies lower than 1.5% were grouped. HV0\* includes HV0a, OTHER includes K, K2, T, R0, R0a, R1, R2, HV1, HV2, N1a, N1b, N1c, N9a, A4, D5, C1d, M1, L1b1, with frequencies lower than 1.5%.

| <b>Males (N=1327)</b> |                          |          |                    |          |                |
|-----------------------|--------------------------|----------|--------------------|----------|----------------|
| Sub-haplogroups       | <b>Controls (N= 699)</b> |          | <b>90+ (N=628)</b> |          | <b>P-value</b> |
|                       | <b>N</b>                 | <b>%</b> | <b>N</b>           | <b>%</b> |                |
| <b>HV*</b>            | 347                      | 49.6     | 318                | 50.6     | 0.447          |
| <b>HV0*</b>           | 24                       | 3.4      | 24                 | 3.8      | 1.000          |
| <b>H*</b>             | 306                      | 43.8     | 280                | 44.6     | 0.476          |
| <b>H1</b>             | 108                      | 15.5     | 75                 | 11.9     | 0.023          |
| <b>H2</b>             | 11                       | 1.6      | 10                 | 1.6      | 1.000          |
| <b>H3</b>             | 16                       | 2.3      | 18                 | 2.9      | 0.732          |
| <b>H5</b>             | 20                       | 2.9      | 24                 | 3.8      | 0.545          |
| <b>H6</b>             | 16                       | 2.3      | 19                 | 3        | 0.612          |
| <b>I</b>              | 13                       | 1.9      | 7                  | 1.1      | 0.263          |
| <b>J1</b>             | 44                       | 6.3      | 40                 | 6.4      | 0.826          |
| <b>J2</b>             | 22                       | 3.1      | 6                  | 1        | 0.004          |
| <b>K1</b>             | 46                       | 6.6      | 47                 | 7.5      | 0.834          |
| <b>T1</b>             | 11                       | 1.6      | 11                 | 1.8      | 1.000          |
| <b>T2</b>             | 54                       | 7.7      | 46                 | 7.3      | 0.545          |
| <b>U</b>              | 93                       | 13.3     | 88                 | 14.0     | 0.876          |
| <b>U2</b>             | 13                       | 1.9      | 12                 | 1.9      | 1.000          |
| <b>U4</b>             | 13                       | 1.9      | 13                 | 2.1      | 1.000          |
| <b>U5a</b>            | 30                       | 4.3      | 24                 | 3.8      | 0.497          |
| <b>U5b</b>            | 17                       | 2.4      | 18                 | 2.9      | 0.866          |
| <b>W</b>              | 16                       | 2.3      | 13                 | 2.1      | 0.711          |
| <b>X</b>              | 19                       | 2.7      | 18                 | 2.9      | 1.000          |
| <b>OTHER</b>          | 34                       | 4.9      | 34                 | 5.4      | 0.903          |

**Table 1S b.** Haplogroup distribution in females. SE=Standard Error; Sub-haplogroups with frequencies lower than 1.5% were grouped. HV0\* includes HV0a, OTHER includes K, K2, T, R0, R0a, R1, R2, HV1, HV2, N1a, N1b, N1c,N9a, A4, D5, C1d, M1, L1b1, with frequencies lower than 1.5%.

| <b>Females (N = 2912)</b> |                           |          |                      |          |                |
|---------------------------|---------------------------|----------|----------------------|----------|----------------|
|                           | <b>Controls (N= 1454)</b> |          | <b>90+ (N= 1458)</b> |          | <b>p-value</b> |
|                           | <b>N</b>                  | <b>%</b> | <b>N</b>             | <b>%</b> |                |
| <b>HV*</b>                | 695                       | 47.8     | 734                  | 50.3     | 0.047          |
| <b>HV0*</b>               | 44                        | 3        | 59                   | 4        | 0.110          |
| <b>H*</b>                 | 618                       | 42.5     | 647                  | 44.4     | 0.107          |
| <b>H1</b>                 | 217                       | 14.9     | 217                  | 14.9     | 0.761          |
| <b>H2</b>                 | 12                        | 0.8      | 32                   | 2.2      | 0.002          |
| <b>H3</b>                 | 69                        | 4.7      | 53                   | 3.6      | 0.200          |
| <b>H5</b>                 | 43                        | 3        | 44                   | 3        | 0.829          |
| <b>H6</b>                 | 31                        | 2.1      | 33                   | 2.3      | 0.708          |
| <b>I</b>                  | 31                        | 2.1      | 39                   | 2.7      | 0.281          |
| <b>J1</b>                 | 109                       | 7.5      | 104                  | 7.1      | 0.944          |
| <b>J2</b>                 | 35                        | 2.4      | 33                   | 2.3      | 1.000          |
| <b>K1</b>                 | 94                        | 6.5      | 70                   | 4.8      | 0.094          |
| <b>T1</b>                 | 42                        | 2.9      | 32                   | 2.2      | 0.348          |
| <b>T2</b>                 | 98                        | 6.7      | 128                  | 8.8      | 0.024          |
| <b>U</b>                  | 220                       | 15.1     | 184                  | 12.6     | 0.910          |
| <b>U2</b>                 | 26                        | 1.8      | 26                   | 1.8      | 1.000          |
| <b>U4</b>                 | 35                        | 2.4      | 21                   | 1.4      | 0.082          |
| <b>U5a</b>                | 79                        | 5.4      | 66                   | 4.5      | 0.398          |
| <b>U5b</b>                | 39                        | 2.7      | 33                   | 2.3      | 0.635          |
| <b>W</b>                  | 23                        | 1.6      | 38                   | 2.6      | 0.052          |
| <b>X</b>                  | 22                        | 1.5      | 24                   | 1.6      | 0.767          |
| <b>OTHER</b>              | 85                        | 5.8      | 72                   | 4.9      | 0.416          |
