# Supplementary material for: The co-occurrence of mtDNA mutations on different oxidative phosphorylation subunits, not detected by haplogroup analysis, affects human longevity and is population specific
Source: PubMed Central journal article supplement (PMC4326891; doi:10.1111/acel.12186), 2013-12-17
Supplement: acel0013-0401-sd4.pdf [file acel0013-0401-sd4.pdf]

**Table 3S.** Rare mtDNA mutations associated with diseases and their distribution in the 90+ and controls of the present study.

| Position | Mutation type | Controls |      | 90+ |      | Region | Disease                                              |
|----------|---------------|----------|------|-----|------|--------|------------------------------------------------------|
|          |               | N.       | %    | N.  | %    |        |                                                      |
| 827      | A/G           | 1        | 0,15 | 0   | 0,00 | 12S    | Deafness                                             |
| 961      | T/C           | 2        | 0,31 | 5   | 0,77 | 12S    | Deafness                                             |
| 1005     | T/C           | 1        | 0,15 | 0   | 0,00 | 12S    | Deafness                                             |
| 1438     | A/G           | 25       | 3,87 | 39  | 6,04 | 12S    | Diabetes Mellitus                                    |
| 1555     | A/G           | 0        | 0,00 | 3   | 0,46 | 12S    | Deafness                                             |
| 3196     | G/A           | 1        | 0,15 | 0   | 0,00 | 16S    | Alzheimer & Parkinson Disease                        |
| 3308     | T/C           | 1        | 0,15 | 0   | 0,00 | ND1    | Encephalomyopathy, MELAS                             |
| 3460     | G/T           | 0        | 0,00 | 0   | 0,00 | ND1    | LHON                                                 |
| 3796     | A/G           | 3        | 0,46 | 5   | 0,77 | ND1    | Dystonia                                             |
| 4295     | A/G           | 8        | 1,24 | 4   | 0,62 | TI     | Maternally Inherited Hypertrophic Cardiomyopathy     |
| 4336     | T/C           | 5        | 0,77 | 12  | 1,86 | TQ     | Alzheimer & Parkinson Disease<br>Deafness & Migraine |
| 5460     | G/A           | 36       | 5,57 | 31  | 4,80 | ND2    | Alzheimer & Parkinson Disease                        |
| 5628     | T/C           | 1        | 0,15 | 0   | 0,00 | tRNA A | Mitochondrial Myopathy, CPEO MTTA CPEO               |
| 5843     | A/G           | 1        | 0,15 | 0   | 0,00 | TY     | Mitochondrial Myopathy Cytopathy                     |
| 6489     | C/A           | 5        | 0,77 | 2   | 0,31 | CO1    | Epilepsy                                             |
| 7444     | G/A           | 4        | 0,62 | 6   | 0,93 | CO1    | Deafness-Sensory Neural Hearing Loss                 |
| 8108     | A/G           | 0        | 0,00 | 1   | 0,15 | CO1    | Deafness-Sensory Neural Hearing Loss                 |

|              |     |     |       |     |       |        |                                                                                     |
|--------------|-----|-----|-------|-----|-------|--------|-------------------------------------------------------------------------------------|
| <b>8302</b>  | A/G | 0   | 0,00  | 1   | 0,15  | tRNA k | MTTK Encephalopathy                                                                 |
| <b>8993</b>  | T/C | 0   | 0,00  | 0   | 0,00  | ATP6   | Leigh Syndrome                                                                      |
| <b>10044</b> | A/G | 8   | 1,24  | 3   | 0,46  | TG     | Encephalomyopathy<br>Gastrointestinal Reflux<br>and Sudden Infant Death<br>Syndrome |
| <b>11084</b> | A/G | 1   | 0,15  | 0   | 0,00  | ND4    | Encephalomyopathy,<br>MELAS                                                         |
| <b>12026</b> | A/G | 0   | 0,00  | 2   | 0,31  | ND4    | Diabetes Mellitus                                                                   |
| <b>12192</b> | G/A | 0   | 0,00  | 3   | 0,46  | TH     | Maternally Inherited<br>Cardiomyopathy                                              |
| <b>12308</b> | A/G | 149 | 23,07 | 116 | 17,96 | TL2    | Mitochondrial Myopathy,<br>CPEO, Stroke                                             |
| <b>15497</b> | G/A | 3   | 0,46  | 1   | 0,15  | CYTB   | MM, Exercise Intolerance                                                            |
| <b>15498</b> | G/A | 0   | 0,00  | 1   | 0,15  | CYTB   | Hypertrophic<br>Cardiomyopathy                                                      |
| <b>15924</b> | A/G | 17  | 2,63  | 27  | 4,18  | TT     | Mitochondrial Myopathy<br>Lethal Infantile<br>Mitochondrial Myopathy                |

**Table 4S:** Distribution of 90+ and controls from different centers participating to GEHA project.

| <b>Recruitment center</b> | <b>Country</b>   | <b>No. 90+</b> | <b>No. younger controls</b> |
|---------------------------|------------------|----------------|-----------------------------|
| Belfast                   | Northern Ireland | 64             | 64                          |
| Louvain                   | Belgium          | 80             | 88                          |
| Bologna                   | Italy            | 213            | 214                         |
| Kiel                      | Germany          | 94             | 96                          |
| Tampere                   | Finland          | 153            | 145                         |
| Montpellier               | France           | 274            | 275                         |
| Newcastle                 | UK               | 99             | 100                         |
| Odense                    | Denmark          | 428            | 441                         |
| Leiden                    | Netherland       | 162            | 167                         |
| Warsaw                    | Poland           | 129            | 132                         |
| Rome                      | Italy            | 75             | 75                          |
| Sassari                   | Italy            | 47             | 52                          |
| Kiev                      | Ukraina          | 49             | 49                          |
| Calabria                  | Italy            | 125            | 152                         |
| Athens                    | Greece           | 94             | 103                         |
| <b>Total</b>              |                  | <b>2,086</b>   | <b>2,153</b>                |

**Table 5S:** Sample distribution and general characteristics of the study participants.

|                  | <b>Males (N = 1,327)</b> |                     | <b>Females (N = 2,912)</b> |                     |
|------------------|--------------------------|---------------------|----------------------------|---------------------|
|                  | <b>90+ (%)</b>           | <b>Controls (%)</b> | <b>90+ (%)</b>             | <b>Controls (%)</b> |
| <b>N</b>         | 628 (47)                 | 699 (53)            | 1,458 (50)                 | 1,454 (50)          |
| <b>Mean Age</b>  | 94,1 ± 2,5               | 61,7 ± 6,2          | 94,5 ± 2,6                 | 61,7 ± 6,2          |
| <b>Age range</b> | 89-103                   | 43-79               | 88-107                     | 49-83               |

**Table 6S:** Modified primer pairs for the complete resequencing (M13 tag is not reported).

|                   | <b>Forward</b>                       | <b>Reverse</b>                       |
|-------------------|--------------------------------------|--------------------------------------|
| <b>Primer 41b</b> | 5'- CTG CTT CTT CTC ACA TGA-3'       | 5'- TAG GTA GGA GTA GCG TG-3'        |
| <b>Primer 43b</b> | 5'- ATC AAT TGG CTT CCT AGG-3'       | 5'- GGC ATC CAT ATA GTC ACT-3'       |
| <b>Primer 44b</b> | 5'- CCT TAT CTG CTT CCT AGT-3'       | 5'-GGG TGC TAT AGG GTA AAT -3'       |
| <b>Primer 45b</b> | 5'- ATT TTG ACT ACC ACA ACT<br>CA-3' | 5'-ATA TGT GTT GGA GAT TGA GA<br>-3' |
